# Supplementary material for: Facile access to efficiently luminescent Ln3+ phosphonic ester coordination polymers (Ln = Eu, Tb, Dy)
Source: Royal Society of Chemistry journal article supplement (doi:10.1039/c7cc06621j), 2017-01-01
Supplement: c7cc06621j1.pdf [file c7cc06621j1.pdf]

**Supporting Information for**

**Facile access to efficiently luminescent Ln<sup>3+</sup> phosphonic ester coordination polymers (Ln = Eu, Tb, Dy)**

Kristijan Krekić, Dieter Klintuch and Rudolf Pietschnig

Table of contents

|                                                                                   |   |
|-----------------------------------------------------------------------------------|---|
| Experimental details .....                                                        | 1 |
| Mass spectra from the reaction solution during the formation of <b>1a</b> : ..... | 2 |
| X-Ray diffraction .....                                                           | 4 |
| Selected emission spectra .....                                                   | 7 |
| References .....                                                                  | 9 |

### Experimental details

All chemical were purchased from Sigma-Aldrich or TCI and used without further purification. NMR measurements were done on Varian 400 MHz and 500 MHz spectrometers. Infrared spectroscopy was done using Bruker ATR IR device with diamond probe. The microwave assisted synthesis was performed in a CEM DISCOVER-SP reactor in pyrex vessels closed with Activent-lids. Excitation and emission spectra as well as luminescent quantum yields (absolute method) measurements were carried out using a Hamamatsu C11347 system. For the refinement of the data ORIGIN 2017 was used. X-ray diffraction was performed using either STOE IPDS 2 with image plate (diameter 34 cm) using Mo-GENIX source ( $\lambda=0.71073$  nm) or STOE StadiVari with DECTRIS PILATUS 200K using Mo-GENIX source ( $\lambda=0.71073$  nm). Structures were solved using dual space method (SHELXT<sup>1</sup>) and are refined against  $F^2$  with SHELXL-2014<sup>2</sup>. All non-hydrogen atoms are refined anisotropically. Hydrogen atoms were placed on adjacent atoms using a riding model. In case of mix metal structure some atoms are refined isotropically due to very large disorder on said atoms. Further programs used in structure analysis consists of WinGX<sup>3</sup>, Mercury<sup>4</sup> and Platon<sup>5</sup>. Details of the structure determinations and refinement for **L**, **1a-d**, **1e** are summarized in Table S1. CCDC-1562260-1562264, 1569994 contain the supplementary crystallographic data for this paper. These data can be obtained free of charge from The Cambridge Crystallographic Data Centre via [www.ccdc.cam.ac.uk/data\\_request/cif](http://www.ccdc.cam.ac.uk/data_request/cif).

**Synthesis of tetraisopropyl biphenyl-4,4'-diylbis(methylene) diphosphonate (L).** In microwave flask 5 g (20 mmol) of 4,4'-di(chloromethyl)biphenyl was placed together with 20 mL (80 mmol) of triisopropyl phosphite. The reaction mixture was heated in a microwave reactor at 200 °C (200 W) under autogenous pressure for 1.5 hours. After cooling colorless crystalline material was formed. The resulting solid was washed with large amount of cold water and dried under reduced pressure. The product was recrystallized from acetone giving 9.6 g of crystalline product affording 94% yield based on bis(chloromethyl)biphenyl.

<sup>1</sup>H NMR (400 MHz, acetone)  $\delta$ : 7.61 (d,  $J = 8.1$  Hz, 4H), 7.42 (dd,  $J = 8.1, 2.4$  Hz, 4H), 4.65 – 4.51 (m, 1H), 3.14 (d,  $J = 21.8$  Hz, 4H), 1.21 (dd,  $J = 34.8, 6.2$  Hz, 24H) ppm. <sup>31</sup>P NMR [<sup>1</sup>H] (202 MHz, acetone)  $\delta$ : 24.0 (m br) ppm. ESI-MS:  $m/z=533.13$  [M+Na]<sup>+</sup>. IR(ATR): 1105 cm<sup>-1</sup> (m, P-O), 1232 cm<sup>-1</sup> (st, P=O). Elemental analysis calc (%) : C 61.17, H 7.90; found: C 61.45 H 8.03

**Synthesis of lanthanide(III) coordination polymers:** The ligand (500 mg, 1 mmol) was dissolved in 5 mL of EtOH. To the solution of ligand a solution of Ln(NO<sub>3</sub>)<sub>3</sub> · xH<sub>2</sub>O (0.66 mmol) in the same solvent was added under heavy stirring at room 20°C. Slow evaporation of the solvent yields colorless crystalline material. (Yield: **1a**: 600 mg, 82 %; **1b**: 550 mg, 74 %; **1c**: 570 mg, 77%; **1d**: 580 mg, 84 %; **1e**: 512 mg, 71%)

Analysis of **1a**:

IR (ATR): 1097 cm<sup>-1</sup> (m, P-O), 1165 cm<sup>-1</sup> (s, P=O)

MALDI-MS of reaction solution:  $m/z=1719.25$  [(Eu(NO<sub>3</sub>)<sub>3</sub>L)<sub>2</sub>+Na]<sup>+</sup>,  $m/z=1634.28$  [(Eu<sub>2</sub>(NO<sub>3</sub>)<sub>5</sub>L<sub>2</sub>)<sup>+</sup>,  $m/z=2438.30$  [(Eu<sub>3</sub>(NO<sub>3</sub>)<sub>8</sub>L<sub>3</sub>)<sup>+</sup>

Elemental analysis calc (%) : C 42.44, H 5.48, N 3.81; found: C 42.37, H 5.46, N 3.92

Analysis of **1b**:

IR (ATR): 1097 cm<sup>-1</sup> (m, P-O), 1165 cm<sup>-1</sup> (s, P=O)

Elemental analysis calc (%) : C 42.17, H 5.44, N 3.78; found: C 42.15, H 5.37, N 3.80

Analysis of **1c**:

IR (ATR): 1097 cm<sup>-1</sup> (m, P-O), 1165 cm<sup>-1</sup> (s, P=O)

Elemental analysis calc (%) : C 42.06, H 5.43, N 3.77; found: C 41.92, H 5.45, N 3.74

Analysis of **1d**:

IR (ATR): 1097 cm<sup>-1</sup> (m, P-O), 1165 cm<sup>-1</sup> (s, P=O)

Elemental analysis calc (%) : C 45.01, H 5.81, N 4.04; found: C 45.26, H 5.92, N 4.28

Analysis of **1e** (trimetallic):

IR (ATR): 1097 cm<sup>-1</sup> (m, P-O), 1168 cm<sup>-1</sup> (s, P=O)

Elemental analysis calc (%) : C 42.61, H 5.50, N 3.82; found: C 42.62, H 5.46, N 3.77

Mass spectra from the reaction solution during the formation of **1a**:

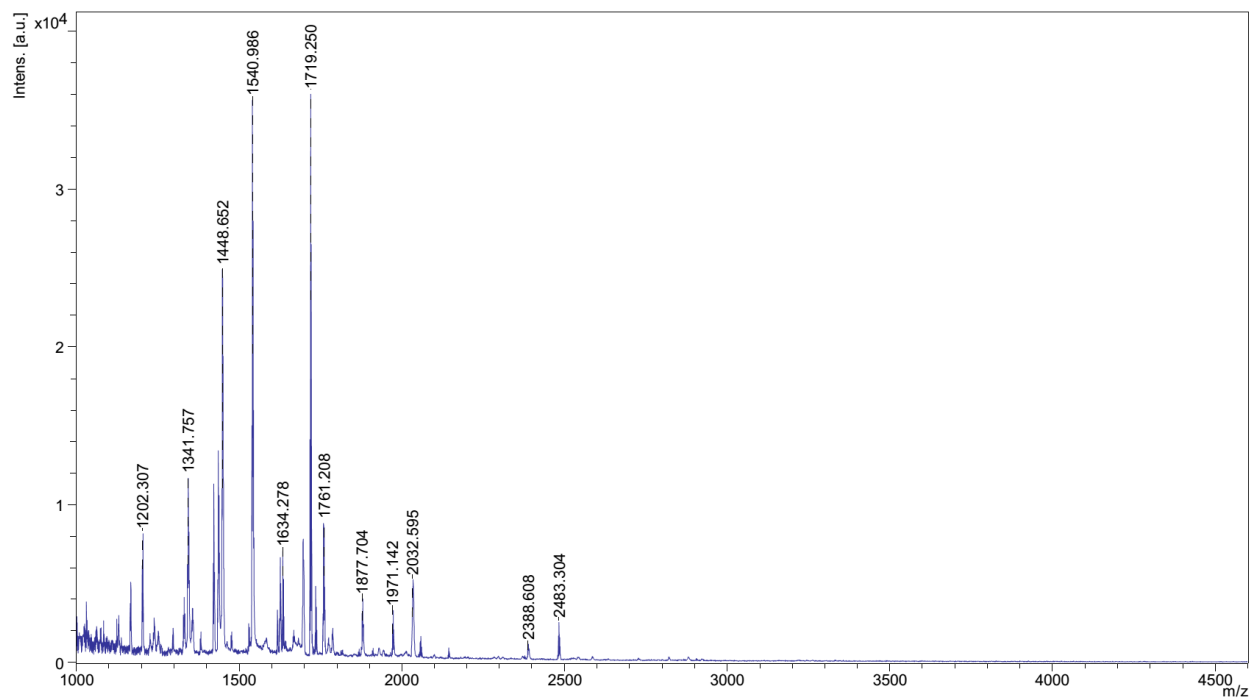

Figure s1. Mass spectrum of 1a reaction solution. Whole range.

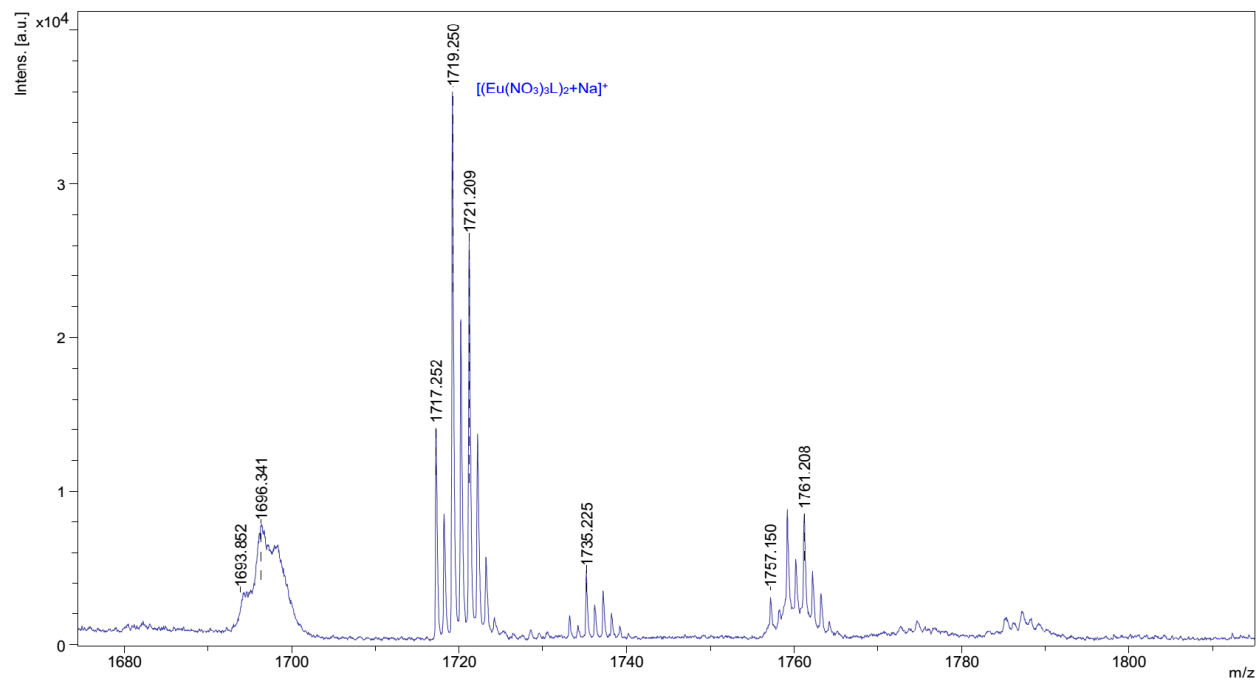

Figure s2. Mass spectrum of 1a reaction solution.  $[(\text{Eu}(\text{NO}_3)_3)_2 + \text{Na}]^+$ .

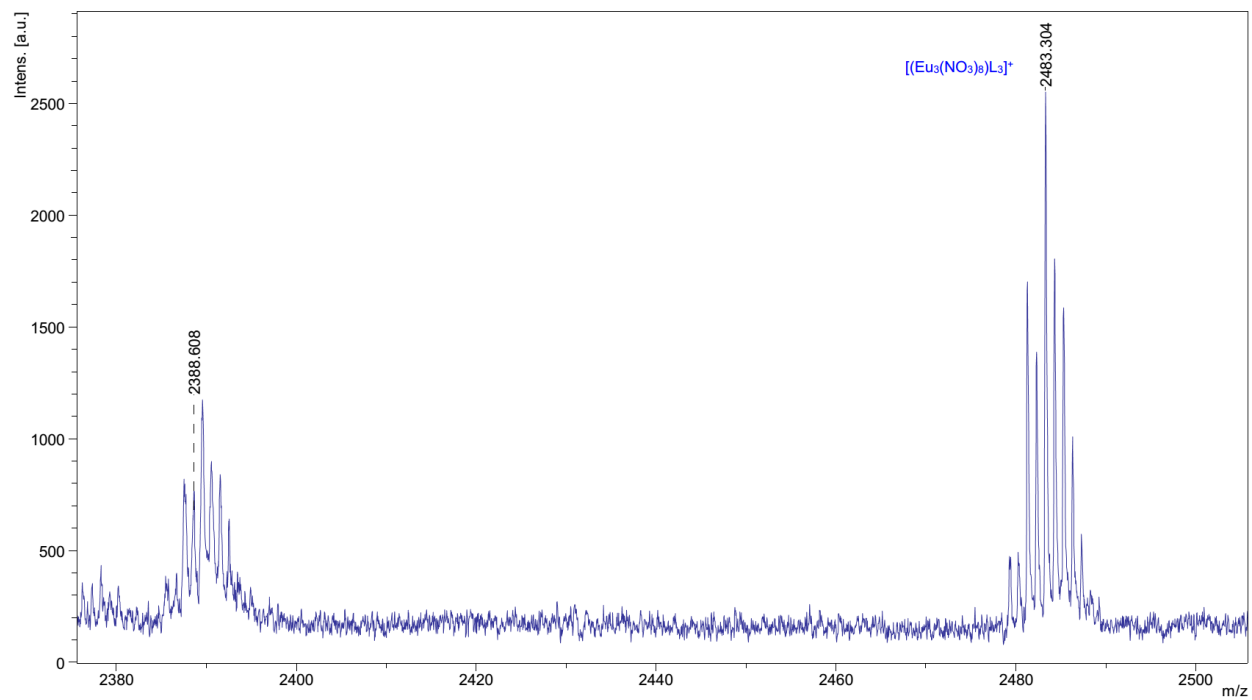

Figure s3. Mass spectrum of 1a reaction solution.  $[(Eu_3(NO_3)_8)L_3]^+$

X-Ray diffraction

Table s1. Crystal data for the coordination polymers and ligand.

|                                                               | L                     | 1a                    | 1b                    | 1c                    | 1d                    | 1e                                    |
|---------------------------------------------------------------|-----------------------|-----------------------|-----------------------|-----------------------|-----------------------|---------------------------------------|
| CCDC                                                          | 1562260               | 1562261               | 1562262               | 1562263               | 1562264               | 1569994                               |
| Empirical formula                                             | C26 H40 O6 P2         | C39 H60 Eu N3 O18 P3  | C39 H60 N3 O18 P3 Tb  | C39 H60 Dy N3 O18 P3  | C39 H60 N3 O18 P3 Y   | C39 H60 Eu0.16 N3 O18 P3 Tb0.70 Y0.14 |
| Formula weight                                                | 510.52                | 1103.77               | 1110.73               | 1114.31               | 1040.72               | 1099.97                               |
| Crystal description                                           | colorless plate       | colorless plate       | colorless plate       | colorless plate       | colorless block       | colorless plate                       |
| Crystal size [mm]                                             | 0.300 X 0.090 X 0.020 | 0.300 X 0.130 X 0.080 | 0.050 X 0.050 X 0.040 | 0.300 X 0.130 X 0.080 | 0.190 X 0.180 X 0.110 | 0.150 X 0.110 X 0.040                 |
| Crystal system, space group                                   | monoclinic P 21/n     | monoclinic 'P 21/n'                   |
| Radiation and $\lambda$ [Å]                                   | Mo K $\alpha$ 0.71073 | 'Mo K $\alpha$ ' 0.71073              |
| Monochromator                                                 | plane graphite        | 'Graded multilayer mirror'            |
| Temperature [K]                                               | 100(2)                | 100(2)                | 100(2)                | 100(2)                | 100(2)                | 100(2)                                |
| Unit cell dimensions:                                         |                       |                       |                       |                       |                       |                                       |
| a [Å]                                                         | 21.8266(18)           | 16.2689(6)            | 16.4639(6)            | 16.4696(6)            | 16.4785(6)            | 16.5126(5)                            |
| b [Å]                                                         | 5.8487(3)             | 13.2684(7)            | 13.4794(3)            | 13.4724(3)            | 13.3577(3)            | 13.4910(4)                            |
| c [Å]                                                         | 23.1849(18)           | 22.3097(9)            | 22.5915(8)            | 22.5458(6)            | 22.5110(6)            | 22.5623(7)                            |
| a [°]                                                         | 90                    | 90                    | 90                    | 90                    | 90                    | 90                                    |
| b [°]                                                         | 109.753(6)            | 103.599(3)            | 104.281(3)            | 104.209(2)            | 103.528(2)            | 104.149(2)                            |
| g [°]                                                         | 90                    | 90                    | 90                    | 90                    | 90                    | 90                                    |
| Volume [Å <sup>3</sup> ]                                      | 2785.6(4)             | 4680.8(4)             | 4858.7(3)             | 4849.5(2)             | 4817.5(2)             | 4873.8(3)                             |
| Z                                                             | 4                     | 4                     | 4                     | 4                     | 4                     | 4                                     |
| Calculated density                                            | 1.217                 | 1.566                 | 1.518                 | 1.526                 | 1.435                 | 1.499                                 |
| F(000)                                                        | 1096                  | 2268                  | 2276                  | 2280                  | 2172                  | 2260                                  |
| Linear absorption coefficient $\hat{\mu}$ [mm <sup>-1</sup> ] | 0.192                 | 1.518                 | 1.627                 | 1.712                 | 1.383                 | 1.560                                 |
| Absorption correction                                         | integration           | integration           | integration           | integration           | integration           | integration                           |
| Unit cell determination                                       | STOE X-area                           |
| Diffractometer                                                | STOE IPDS 2           | STOE IPDS 2           | STOE IPDS 2           | STOE IPDS II          | STOE IPDS 2           | STOE STADIVARI                        |
| Radiation source                                              | Genix Mo HF           | Mo Genix                              |
| Scan type                                                     | Omega scan                            |

|                             |                |                |                |                |                |                |
|-----------------------------|----------------|----------------|----------------|----------------|----------------|----------------|
| Θ range for data collection | 1.58 - 26.31   | 1.40 - 26.35   | 1.51 - 26.14   | 1.51 - 26.35   | 1.52 - 26.27   | 1.75 - 29.15   |
| Index ranges                | -26 <h< 26     | -19 <h< 19     | -19 <h< 20     | -18 <h< 20     | -18 <h< 20     | -19 <h< 19     |
|                             | -6 <k< 7       | -14 <k< 16     | -16 <k< 14     | -16 <k< 16     | -16 <k< 16     | -16 <k< 15     |
|                             | -28 <l< 27     | -27 <l< 25     | -27 <l< 27     | -27 <l< 27     | -27 <l< 27     | -26 <l< 20     |
| Refl. collected / unique    | 12393 / 5233   | 22264 / 8816   | 22107 / 9122   | 24710 / 9125   | 23678 / 9036   | 30749 / 8568   |
| Significant unique refl.    | 3407           | 6729           | 6262           | 7666           | 7678           | 6587           |
| R(int), R(sigma)            | 0.1167, 0.0927 | 0.0348, 0.0379 | 0.0560, 0.0648 | 0.0366, 0.0320 | 0.0261, 0.0252 | 0.0649, 0.0539 |
| Completeness to Θ = 26.0Å°  | 0.983          | 0.99           | 0.985          | 0.986          | 0.986          | 0.998          |
| Refinement method           | SHELXL-2014/7  | SHELXL-2014/7  | SHELXL-2014/7  | SHELXL-2014/7  | SHELXL-2014/7  | SHELXL-2014/7  |
| Data/parameters/restraints  | 5233 / 286 / 0 | 8816 / 475 / 1 | 9122 / 577 / 0 | 9125 / 577 / 0 | 9036 / 577 / 0 | 8568 / 564 / 4 |
| Goodness-of-fit on F2       | 1.704          | 1.175          | 1.03           | 1.053          | 1.03           | 2.572          |
| Final R indices [I > 2σ(I)] | 0.1503         | 0.0696         | 0.0601         | 0.0588         | 0.0498         | 0.1848         |
| R indices (all data)        | 0.1863         | 0.0912         | 0.0935         | 0.0694         | 0.0603         | 0.212          |

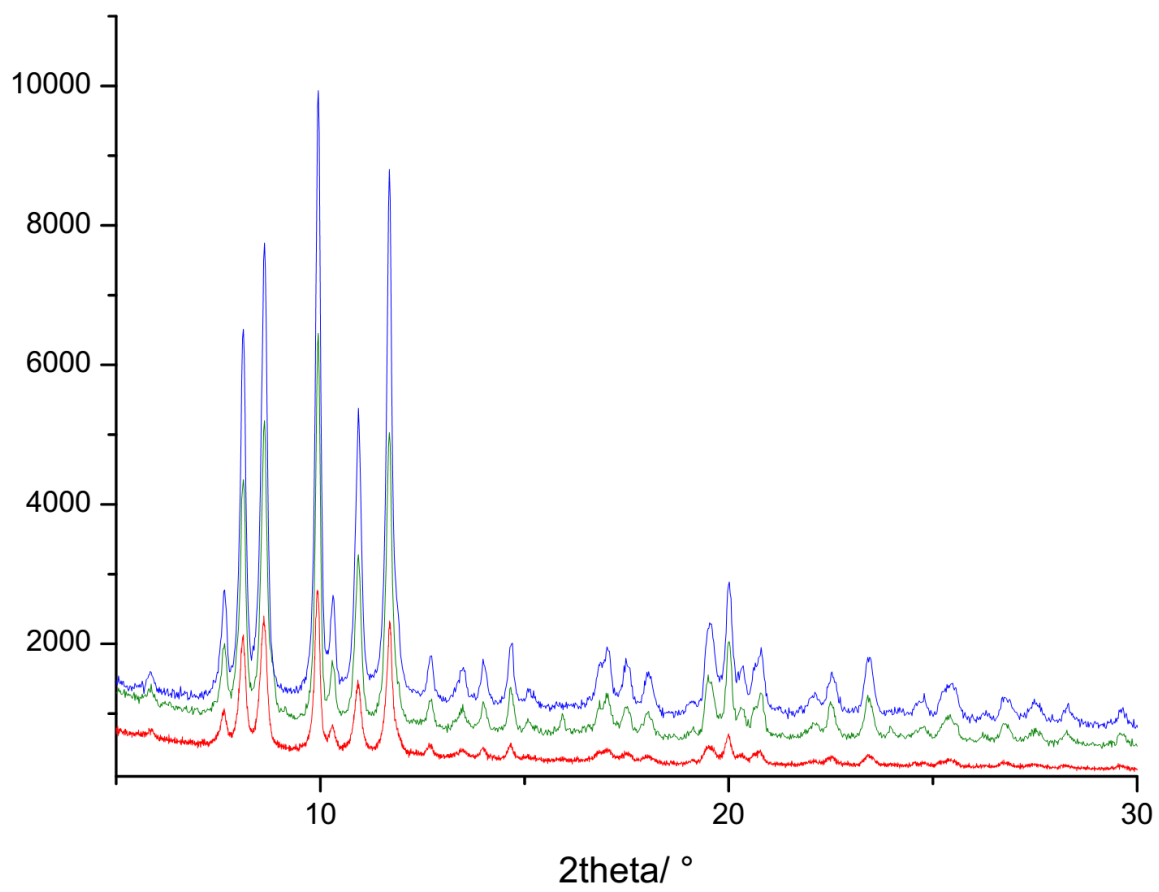

Figure s4. Powder diffraction of bulk **1e** (green) vs. **1a** (Red) vs **1b** (blue)

Selected emission spectra

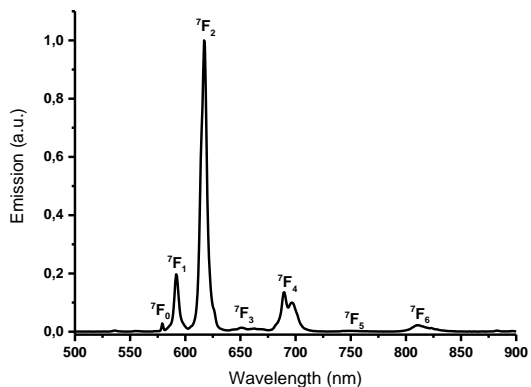

Figure s5. Normalized emission spectrum of **1a** at 330 nm excitation wavelength with the observed  ${}^5D_0 \rightarrow {}^7F_n$  transitions.

Table s2. Transitions observed in luminescence spectrum of **1a**

| Transition                    | Wavelength [nm] | Comment                      |
|-------------------------------|-----------------|------------------------------|
| ${}^5D_0 \rightarrow {}^7F_0$ | 579             | Due to $C_1$ symmetry        |
| ${}^5D_0 \rightarrow {}^7F_1$ | 592             |                              |
| ${}^5D_0 \rightarrow {}^7F_2$ | 617             | High intensity due to ligand |
| ${}^5D_0 \rightarrow {}^7F_3$ | 651             | Forbidden transition         |
| ${}^5D_0 \rightarrow {}^7F_4$ | 690/697         | Doublet                      |
| ${}^5D_0 \rightarrow {}^7F_5$ | 749             | Forbidden transition         |
| ${}^5D_0 \rightarrow {}^7F_6$ | 811             |                              |

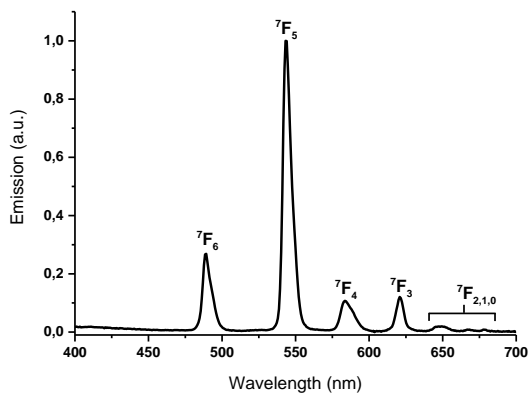

Figure s6. Normalized emission spectrum of **1b** at 318 nm excitation wavelength with the observed  ${}^5D_4 \rightarrow {}^7F_n$  transitions.



Table s3. Transitions observed in luminescence spectrum of **1b**

| Transition                    | Wavelength [nm] |
|-------------------------------|-----------------|
| ${}^5D_4 \rightarrow {}^7F_6$ | 489             |
| ${}^5D_4 \rightarrow {}^7F_5$ | 543             |
| ${}^5D_4 \rightarrow {}^7F_4$ | 584             |
| ${}^5D_4 \rightarrow {}^7F_3$ | 621             |
| ${}^5D_4 \rightarrow {}^7F_2$ | 649             |
| ${}^5D_4 \rightarrow {}^7F_1$ | 668             |
| ${}^5D_4 \rightarrow {}^7F_0$ | 678             |

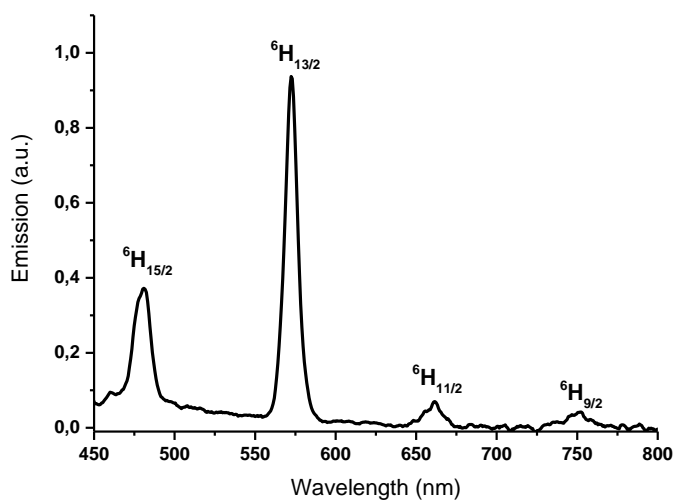

Figure s7. Normalized emission spectrum of **1c** at 399 nm excitation wavelength with the observed  ${}^5F_{9/2} \rightarrow {}^6H_{n/2}$  transitions.

Table s4. Transitions observed in luminescence spectrum of **1c**

| Transition                             | Wavelength [nm] |
|----------------------------------------|-----------------|
| ${}^5F_{9/2} \rightarrow {}^6H_{15/2}$ | 481             |
| ${}^5F_{9/2} \rightarrow {}^6H_{13/2}$ | 573             |
| ${}^5F_{9/2} \rightarrow {}^6H_{11/2}$ | 661             |
| ${}^5F_{9/2} \rightarrow {}^6H_{9/2}$  | 750             |

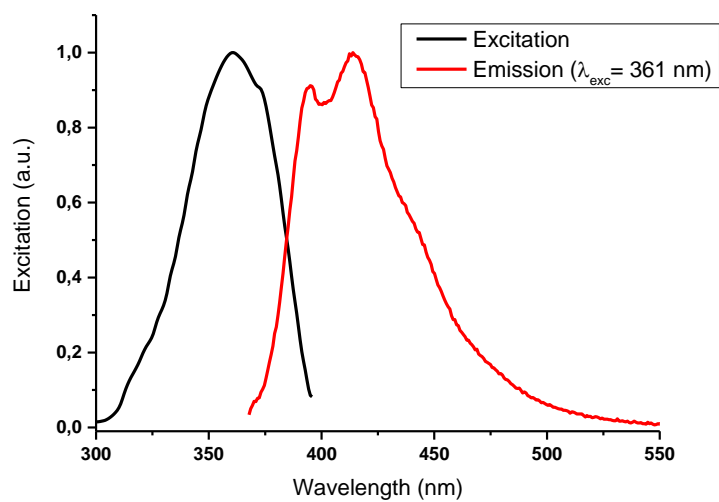

Figure s8. Excitation and emission spectra of  $[Y(NO_3)_3]_2L_3$  at 361 nm excitation wavelength.

#### References

- (1) Sheldrick, G. SHELXT - Integrated space-group and crystal-structure determination. *Acta. Crystallogr. A.* **2015**, *71* (1), 3.
- (2) Sheldrick, G. Crystal structure refinement with SHELXL. *Acta. Crystallogr. C.* **2015**, *71* (1), 3.
- (3) Farrugia, L. J. WinGXandORTEP for Windows: an update. *J. Appl. Crystallogr.* **2012**, *45* (4), 849.
- (4) Macrae, C. F.; Edgington, P. R.; McCabe, P.; Pidcock, E.; Shields, G. P.; Taylor, R.; Towler, M.; van de Streek, J. Mercury: visualization and analysis of crystal structures. *J. Appl. Crystallogr.* **2006**, *39* (3), 453.
- (5) Spek, A. L. Structure validation in chemical crystallography. *Acta. Crystallogr. D.* **2009**, *65* (Pt 2), 148.
